# Supplementary material
Source: publisher figshare collection journal article supplement (https://springernature.figshare.com/ndownloader/files/31577444)
Supplement: Supplementary file [file 31577444]

University Hospital Goettingen  
Department of Anesthesiology, Emergency and Intensive Care Medicine  
Robert-Koch-Str. 40  
37075 Goettingen/Germany

## Diagnostic report FASP-ICU study

Number of pseudonymization:

*Patient label*

Date:

Version: 2.6.8

Initial examination: ☐

Follow-up examination: No. \_\_\_\_

Investigator:

### Ocular ultrasound

☐ not performed / evaluation not possible

☐

☐ Optic nerve sheath diameter indicating intracerebral pressure below 20 mmHg

☐ Optic nerve sheath diameter indicating intracerebral pressure above 20 mmHg

Additional findings

### Vascular ultrasound

☐ not performed / evaluation not possible

☐

|                             |                                           |                                       |
|-----------------------------|-------------------------------------------|---------------------------------------|
| Left internal jugular vein  | <input type="checkbox"/> non-compressible | <input type="checkbox"/> compressible |
| Right internal jugular vein | <input type="checkbox"/> non-compressible | <input type="checkbox"/> compressible |
| Left axillary vein          | <input type="checkbox"/> non-compressible | <input type="checkbox"/> compressible |
| Right axillary vein         | <input type="checkbox"/> non-compressible | <input type="checkbox"/> compressible |
| Left femoral vein           | <input type="checkbox"/> non-compressible | <input type="checkbox"/> compressible |
| Right femoral vein          | <input type="checkbox"/> non-compressible | <input type="checkbox"/> compressible |
| Left popliteal vein         | <input type="checkbox"/> non-compressible | <input type="checkbox"/> compressible |
| Right popliteal vein        | <input type="checkbox"/> non-compressible | <input type="checkbox"/> compressible |

Inferior vena cava

☐ not performed / evaluation not possible

☐ distended IVC (normal with PEEP)

☐ non-distended IVC

☐ IVC indicating volume deficit

Abdominal aorta

☐ not assessed / examination not possible

☐ no aneurysm

☐ aneurysm  $\varnothing$  \_\_\_\_\_ cm

☐ aorta not assessable in entire length; no aneurysm in assessable sections

Additional findings



### Additional findings

### Additional findings



**Focused abdominal ultrasound**☐ not performed / evaluation not possible☐Gallbladder☐ not performed / evaluation not possible☐ no obvious abnormalities☐ gallbladder not sufficiently assessable ☐ sludge☐ cholelithiasis ☐ atonic gallbladder

Suspected cholecystitis

☐ no ☐ wall thickening > 3 mm ☐ perivesicular fluid

Suspected cholestasis

☐ no ☐ dilated CBD \_\_\_\_ mm ☐ double-barrel phenomenonPancreas☐ not performed / evaluation not possible☐ no obvious abnormalities☐ signs of pancreatitisLiver☐ not performed / evaluation not possible☐ no obvious abnormalities☐ reduced liver size☐ liver enlargement (hepatomegaly)☐ signs of cirrhosis☐ dilated hepatic portal vein☐ dilated hepatic veins☐ suspected liver hematomaSpleen☐ not performed / evaluation not possible☐ no obvious abnormalities☐ splenomegaly☐ splenic hematomaKidneys☐ not performed / evaluation not possible

Kidney size

☐ normal☐ reduced☐ left☐ right☐ enlarged☐ left☐ right

Dilated renal pelvis

☐ no☐ left☐ right

Reduced renal parenchyma

☐ no☐ yes

Urolithiasis

☐ no☐ yes

Location: \_\_\_\_\_

Intestinal☐ not performed / evaluation not possible

Peristalsis

☐ normal☐ weak☐ absent

Suspected ileus

☐ no☐ yesUrinary bladder☐ not performed / evaluation not possible☐ empty☐ filled☐ distended☐ bladder tamponadePneumoperitoneum☐ not performed / evaluation not possible☐ no☐ yesFree fluid / ascites☐ not performed / evaluation not possible☐ no☐ minimal☐ moderate☐ massive

Location

☐ diffuse☐ hepatorenal recess



- ☐ splenorenal recess      ☐ around bladder  
☐ other location: \_\_\_\_\_

## Additional findings

## Legend

Sonographic conditions (quality rating) ☐

Sonographic assessment quality grading as rated in the context of ICU limitations:

1 = optimal                      2 = good                      3 = sufficient                      4 = substandard                      5 = partially insufficient  
6 = mostly insufficient                      7 = assessment not possible

Mark option ☒ or ☒
